# Supplementary material for: The zone-refine driven growth of jellyfish-like core–shell nanowires
Source: Royal Society of Chemistry journal article supplement (doi:10.1039/c0cp00890g), 2010-01-01
Supplement: c0cp00890g.pdf [file c0cp00890g.pdf]

Supplementary file

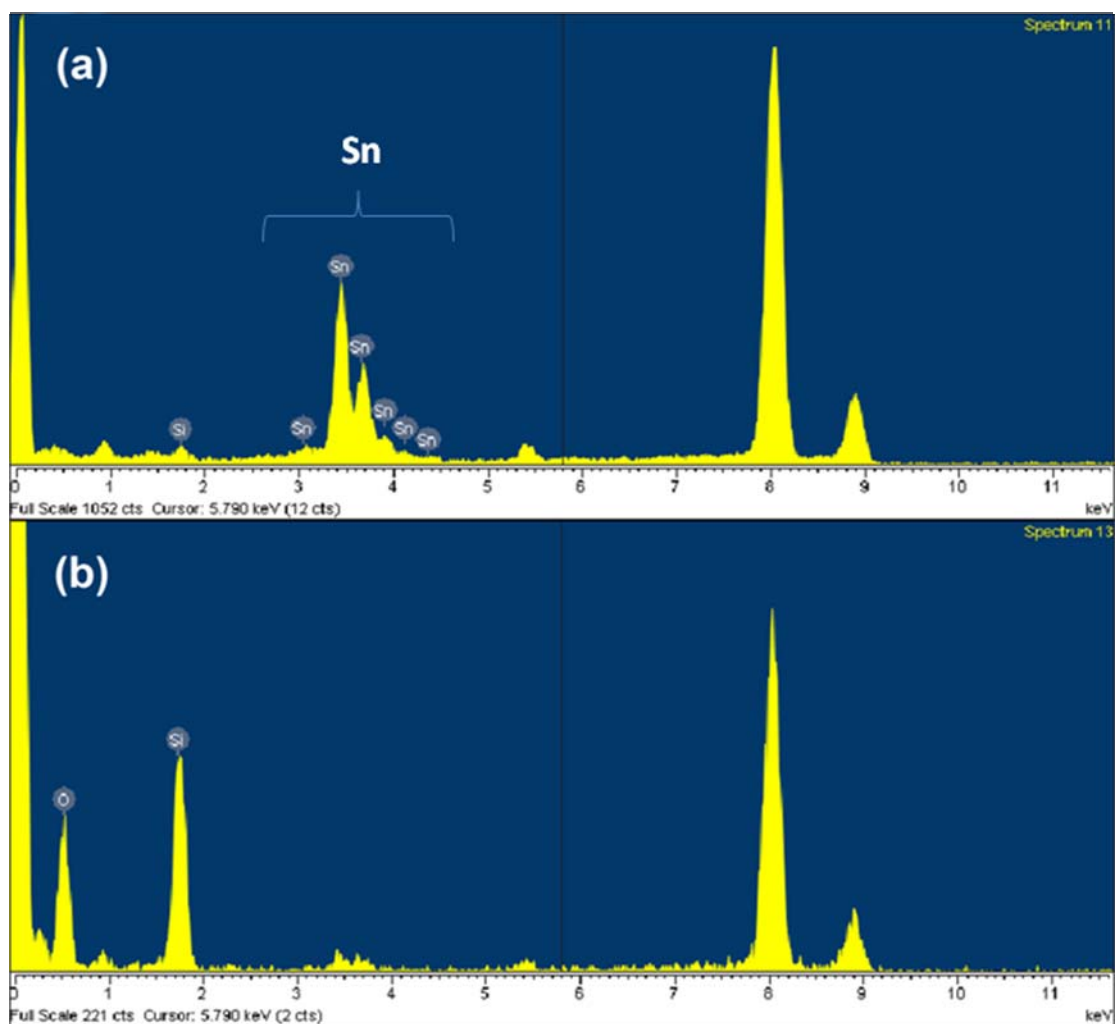

Fig. S1 EDX spectra of (a) as-prepared and (b) BOE treated nano-jellyfishes. Note that metal particles are removed by BOE treatment and Sn signal is absent accordingly. The peaks at 8 to 9 keV arise from copper grids.
